# Supplementary material
Source: publisher site journal article supplement (https://www.dovepress.com/article/514101)
Supplement: Supplementary file 1 [file 514101-Revised-Supplementary-Figures-1-2.docx]

# **SUPPLEMENTARY FIGURE 1: QUESTIONAIRE (IN VIETNAMESE)**

Mã số nghiên cứu : _ _ _

Ngày : _ _/_ _/22

**BỘ CÂU HỎI NGHIÊN CỨU
“KHẢO SÁT CHẤT LƯỢNG CUỘC SỐNG CỦA BỆNH NHÂN NHIỄM HIV/AIDS TẠI VIỆT NAM”**

Trước tiên, chúng tôi xin hỏi anh/chị một số thông tin cá nhân cũng như tiền sử y khoa của anh/chi

| **STT** | **Nội dung** | **Trả lời** | **Ghi chú** |
| --- | --- | --- | --- |
| **A. THÔNG TIN CÁ NHÂN** | | | |
| **A.1** | Năm sinh | ……………………… |  |
| **A.2** | Giới | 1. Nam  2. Nữ |  |
| **A.3** | Đỉa chỉ cư trú | 1. TP. Hồ Chí Minh  2. Khác :………… | Nếu “Khác”, anh/chị vui lòng cho biết Tỉnh |
| **A.4** | Anh/chị học đếp cấp mấy? | 1. Cấp I  2. Cấp II  3. Cấp III  4. Trên cấp III |  |
| **A.5** | Tình trạng hôn nhân hiện của bạn ra sao? | 1. Độc thân  2. Đang sống chung với chồng/vợ  3. Đang sống chung với người tình  4. Ly thân/ ly dị  5. Góa |  |
| **A.6** | Nghề nghiệp của anh/ chị hiện tại là gì? | 1. Lao động tự do  2. Buôn bán  3. Công nhân viên  4. Công nhân  5. Thất nghiệp  6. Khác (ghi rõ) :……….. |  |
| **A.7** | Anh/chị thu nhập hàng tháng có ổn định không? | 1. Ổn định  2. Không ổn định |  |
| **A.8** | Anh/chị có theo tôn giáo nào không? | 1. Có  2. Không |  |
| **A.9** | Kinh tế gia đình anh chị có khó khăn hay không? | 1. Có  2. Không |  |
| **B. TIỀN SỬ Y KHOA** | | | |
| **B.1** | Thời gian nhiễm HIV | 1. ≤ 1 năm  2. > 1 năm |  |
| **B.2** | Anh/chị nhiễm HIV qua đường nào | 1. Quan hệ tình dục  2. Tiêm chích ma túy  3. Khác |  |
| **B.3** | Thời gian uống ARV | 1. ≤ 1 năm  2. > 1 năm |  |
| **B.4** | Phác đồ ARV | …………………………… |  |
| **B.5** | Số lượng TCD4 gần nhất | …………………………… |  |
| **B.6** | Anh/chị uống ARV mấy lần 1 ngày | 1. 1 lẩn  2. 2 lần |  |
| **B.7** | Trong 3 tháng qua, anh/chị có quên uống thuốc ngày nào không? | 1. Không  2. Có (____lần/tháng)  3. Không nhớ | Nếu “Có”, anh/chị vui lòng cho biết số liểu thuốc quên trong 3 tháng qua |
| **B.8** | Anh/chị có hút thuốc không? | 1. Có  2. Không |  |
| **B.9** | Anh/chị có mắc bệnh mạn tính gì không? | 1. Có :…………….  2. Không | Nếu “Có”, vui lòng cho biết bệnh |

**Q. CHẤT LƯỢNG CUỘC SỐNG**

Những câu hỏi dưới đây sẽ hỏi anh/chị về chất lượng cuộc sống, sức khỏe và các khía cạnh khác trong cuộc sống anh/chị trong **2 TUẦN** qua

|  |  | **Không** | **Một ít** | **Bình thường** | **Tốt** | **Rất tốt** |
| --- | --- | --- | --- | --- | --- | --- |
| **Q.1** | Anh/chị thấy cuộc sống hiện tại có tốt không? | 1 | 2 | 3 | 4 | 5 |
| **Q.2** | Anh/chị có hài lòng về cuộc sống hiện tại của mình không? | 1 | 2 | 3 | 4 | 5 |

Những câu hỏi dưới đây sẽ hỏi anh/chị đã trải qua mọi việc trong **2 TUẦN** qua như thế nào? Xin anh/chị vui lòng khoanh tròn vào sự lựa chọn thích hợp nhất với anh/chị

|  |  | **Không** | **Một ít** | **Bình thường** | **Nhiều** | **Rất nhiều** |
| --- | --- | --- | --- | --- | --- | --- |
| **Q.3** | Tình trạng bệnh của anh/chị có ảnh hưởng đến những việc làm hàng ngày không? | 1 | 2 | 3 | 4 | 5 |
| **Q.4** | Anh/chị có hài lòng về cuộc sống hiện tại của mình không? | 1 | 2 | 3 | 4 | 5 |
| **Q.5** | Anh/chị có nghĩ bản thân mình phải uống thuốc mới có thể làm việc và sinh hoạt hằng ngày hay không? | 1 | 2 | 3 | 4 | 5 |
| **Q.6** | Anh/chị có đang tận hưởng cuộc sống hiện tại không? | 1 | 2 | 3 | 4 | 5 |
| **Q.7** | Anh/chị cảm thấy cuộc sống hiện tại có ý nghĩa hay không? | 1 | 2 | 3 | 4 | 5 |
| **Q.8** | Anh/chị có phiền lòng khi bị những người xung quanh khiển trách về tình trạng nhiễm HIV hay không? | 1 | 2 | 3 | 4 | 5 |
| **Q.9** | Anh/chị có sợ khi nghĩ về tương lai hay không? | 1 | 2 | 3 | 4 | 5 |
| **Q.10** | Anh/chị có lo lắng về cái chết hay không? | 1 | 2 | 3 | 4 | 5 |
| **Q.11** | Anh/chị cảm thấy mình có thể tập trung suy nghĩ hay không? | 1 | 2 | 3 | 4 | 5 |
| **Q.12** | Anh/chị cảm nhận cuộc sống hằng ngày có an toàn hay không? | 1 | 2 | 3 | 4 | 5 |
| **Q.13** | Môi trường sống của anh/chị có tốt hay không? | 1 | 2 | 3 | 4 | 5 |

Những câu hỏi dưới đây sẽ hỏi anh/chị về khả năng hoàn thành khi làm bất kỳ công việc gì trong **2 TUẦN** qua. Xin anh/chị vui lòng khoanh tròn vào sự lựa chọn thích hợp nhất với anh/chị

|  |  | **Không** | **Một ít** | **Vừa vừa** | **Hầu như đủ** | **Hoàn toàn đủ** |
| --- | --- | --- | --- | --- | --- | --- |
| **Q.14** | Anh/chị có đủ năng lượng cho hoạt động hằng ngày hay không? | 1 | 2 | 3 | 4 | 5 |
| **Q.15** | Anh/chị có hài lòng về ngoại hình hiện tại của mình không? | 1 | 2 | 3 | 4 | 5 |
| **Q.16** | Anh/chị có đủ tiền cho sinh hoạt hằng ngày hay không? | 1 | 2 | 3 | 4 | 5 |
| **Q.17** | Những người quen có chấp nhận tình trạng bệnh của anh/chị hay không? | 1 | 2 | 3 | 4 | 5 |
| **Q.18** | Anh/chị có dễ dàng tìm được thông tin mà anh chị cần tìm trong cuộc sống hằng ngày hay không? | 1 | 2 | 3 | 4 | 5 |
| **Q.19** | Khi rãnh rỗi, anh/chị có làm những điều mình thích hay không? | 1 | 2 | 3 | 4 | 5 |
| **Q.20** | Anh/chị đi đứng có dễ dàng hay không ? | 1 | 2 | 3 | 4 | 5 |

Trong câu hỏi dưới đây sẽ hỏi anh/chị cảm thất tốt hay thoải mái đến mức độ nào về những khía cạnh khác nhau trong cuộc sống anh/chị trong **2 TUẦN** qua.

|  |  | **Không** | **Một ít** | **Bình thường** | **Hài lòng** | **Rất hài long** |
| --- | --- | --- | --- | --- | --- | --- |
| **Q.21** | Anh/chị có hài lòng về giấc ngủ của mình hay không? | 1 | 2 | 3 | 4 | 5 |
| **Q.22** | Anh/chị có hài lòng về khả năng thực hiện các hoạt động sinh hoạt hằng ngày hay không? | 1 | 2 | 3 | 4 | 5 |
| **Q.23** | Anh/chị có hài lòng về khả năng làm việc của mình hay không? | 1 | 2 | 3 | 4 | 5 |
| **Q.24** | Anh/chị có hài lòng về bản thân mình hay không? | 1 | 2 | 3 | 4 | 5 |
| **Q.25** | Anh/chị có hài lòng về các mối quan hệ xung quang hay không? | 1 | 2 | 3 | 4 | 5 |
| **Q.26** | Anh/chị có hài lòng về mối quan hệ tình dục hiện tại hay không? | 1 | 2 | 3 | 4 | 5 |
| **Q.27** | Anh/chị có hài lòng khi nhận được sự giúp đỡ của bạn bè hay không? | 1 | 2 | 3 | 4 | 5 |
| **Q.28** | Anh/chị có hài lòng với điều kiện sống hiện tại hay không? | 1 | 2 | 3 | 4 | 5 |
| **Q.29** | Anh/chị có hài lòng với khả năng tiếp cận các dịch vụ chăm sóc sức khỏe hay không? | 1 | 2 | 3 | 4 | 5 |
| **Q.30** | Anh/chị có hài lòng về phương tiện đi lại của mình hay không ? | 1 | 2 | 3 | 4 | 52 |

Câu hỏi dưới đây sẽ hỏi anh/chị về cảm nhận của anh/chị hay trải qua một số việc thường xuyên đến mức nào trong vòng **2 TUẦN** qua

|  |  | **Không** | **Hiếm khi** | **Khá thường xuyên** | **Rất thường xuyên** | **Luôn luôn** |
| --- | --- | --- | --- | --- | --- | --- |
| **Q.31** | Anh/chị có thường hay buồn, thất vọng, chán nản, trầm cảm hay không? | 1 | 2 | 3 | 4 | 5 |

**XIN CHÂN THÀNH CẢM ƠN SỰ THAM GIA CỦA ANH/CHỊ**

**KÍNH CHÚC ANH/CHỊ THẬT NHIỀU NIỀM VUI VÀ SỨC KHỎE!**

# **SUPPLEMENTARY FIGURE 2: QUESTIONAIRE (IN ENGLISH)**

Patient ID : _ _ _

Date : _ _/_ _/22

**QUESTIONAIRE
“A STUDY OF QUALITY OF LIFE AMONG PATIENTS LIVING WITH HIV/AIDS IN VIET NAM”**

First, we would like to ask you for some personal and medical history information.

|  | **Question** | **Answer** | **Note** |
| --- | --- | --- | --- |
| **A. PERSONAL INFORMATION** | | | |
| **A.1** | Year of birth | ……………………… |  |
| **A.2** | Gender | 1. Male  2. Female |  |
| **A.3** | Residence | 1. Ho Chi Minh city  2. Other :………… | If “Other”, please indicate Province |
| **A.4** | What is your highest level of education? | 1. Primary school  2. Secondary school  3. High school  4. University/College or higher |  |
| **A.5** | What is your current marital status? | 1. Single  2. Living with your husband/wife  3. Living with a lover  4. Divorced/Separate  5. Widow/widower |  |
| **A.6** | What is your current job? | 1. Freelance  2. Trade  3. Office staff  4. Workers  5. Unemployment  6. Other (specify): ……… |  |
| **A.7** | Is your monthly income stable? | 1. Stable  2. Not stable |  |
| **A.8** | Do you participate any religion? | 1. Yes  2. No |  |
| **A.9** | Is your family struggling financially? | 1. Yes  2. No |  |
| **B. MEDICAL HISTORY** | | | |
| **B.1** | How long have you know you have been infected with HIV ? | 1. ≤ 1 year  2. > 1 year |  |
| **B.2** | What is your HIV transmission? | 1. Unprotected sex  2. Injecting drugs  3. Other |  |
| **B.3** | How long have you been using ART? | 1. ≤ 1 year  2. > 1 year |  |
| **B.4** | What is your ARV regimen? | …………………………… |  |
| **B.5** | What is your current TCD4 ? | …………………………… |  |
| **B.6** | How many times a day do you take ARVs? | 1. Once  2. Twice |  |
| **B.7** | In the past 3 months, have you forgotten to take any ARV doses? | 1. None  2. Yes (____times/month)  3. Do not remember | If “Yes”, please indicate the number of missed doses |
| **B.8** | Do you smoke? | 1. Yes  2. No |  |
| **B.9** | Do you have any chronic disease? | 1. Yes:………..  2. No | If “Yes”, please indicate disease |

**Q. QUALITY OF LIFE**

Please read each question, assess your feelings, and circle the number on the scale for each question that gives the best answer for you.

|  |  | Very poor | Poor | Neither poor nor good | Good | Very good |
| --- | --- | --- | --- | --- | --- | --- |
| **Q.1** | How would you rate your quality of life? | 1 | 2 | 3 | 4 | 5 |

|  |  | Very dissatisfied | Dissatisfied | Neither satisfied nor dissatisfied | Satisfied | Very satisfied |
| --- | --- | --- | --- | --- | --- | --- |
| **Q.2** | How satisfied are you with your health? | 1 | 2 | 3 | 4 | 5 |

The following questions ask about **how much** you have experienced certain things in the **LAST TWO WEEKS**.

|  |  | Not at all | A little | A moderate amount | Very much | An extreme amount |
| --- | --- | --- | --- | --- | --- | --- |
| **Q.3** | To what extent do you feel that physical pain prevents you from doing what you need to do? | 1 | 2 | 3 | 4 | 5 |
| **Q.4** | How much are you bothered by any physical problems related to your HIV infection? | 1 | 2 | 3 | 4 | 5 |
| **Q.5** | How much do you need any medical treatment to function in your daily life? | 1 | 2 | 3 | 4 | 5 |
| **Q.6** | How much do you enjoy life? | 1 | 2 | 3 | 4 | 5 |
| **Q.7** | To what extent do you feel your life to be meaningful? | 1 | 2 | 3 | 4 | 5 |
| **Q.8** | To what extent are you bothered by people blaming you for your HIV status | 1 | 2 | 3 | 4 | 5 |
| **Q.9** | How much do you fear the future? | 1 | 2 | 3 | 4 | 5 |
| **Q.10** | How much do you worry about death? | 1 | 2 | 3 | 4 | 5 |
| **Q.11** | How well are you able to concentrate? | 1 | 2 | 3 | 4 | 5 |
| **Q.12** | How safe do you feel in your daily life? | 1 | 2 | 3 | 4 | 5 |
| **Q.13** | How healthy is your physical environment? | 1 | 2 | 3 | 4 | 5 |

The following questions ask about **how completely** you experience or were able to do certain things in the **LAST** **TWO WEEKS**.

|  |  | Not at all | A little | Moderately | Mostly | Completely |
| --- | --- | --- | --- | --- | --- | --- |
| **Q.14** | Do you have enough energy for everyday life? | 1 | 2 | 3 | 4 | 5 |
| **Q.15** | Are you able to accept your bodily appearance? | 1 | 2 | 3 | 4 | 5 |
| **Q.16** | Have you enough money to meet your needs? | 1 | 2 | 3 | 4 | 5 |
| **Q.17** | To what extent do you feel accepted by the people you know? | 1 | 2 | 3 | 4 | 5 |
| **Q.18** | How available to you is the information that you need in your day-to-day life? | 1 | 2 | 3 | 4 | 5 |
| **Q.19** | To what extent do you have the opportunity for leisure activities? | 1 | 2 | 3 | 4 | 5 |
| **Q.20** | How well are you able to get around? | 1 | 2 | 3 | 4 | 5 |

The following questions ask you how **good or satisfied** you have felt about various aspects of your life over the **LAST** **TWO WEEKS**.

|  |  | Very dissatisfied | Dissatisfied | Neither satisfied nor dissatisfied | Satisfied | Very satisfied |
| --- | --- | --- | --- | --- | --- | --- |
| **Q.21** | How satisfied are you with your sleep? | 1 | 2 | 3 | 4 | 5 |
| **Q.22** | How satisfied are you with your ability to perform your daily living activities? | 1 | 2 | 3 | 4 | 5 |
| **Q.23** | How satisfied are you with your capacity for work? | 1 | 2 | 3 | 4 | 5 |
| **Q.24** | How satisfied are you with yourself? | 1 | 2 | 3 | 4 | 5 |
| **Q.25** | How satisfied are you with your personal relationships? | 1 | 2 | 3 | 4 | 5 |
| **Q.26** | How satisfied are you with your sex life? | 1 | 2 | 3 | 4 | 5 |
| **Q.27** | How satisfied are you with the support you get from your friends? | 1 | 2 | 3 | 4 | 5 |
| **Q.28** | How satisfied are you with the conditions of your living place? | 1 | 2 | 3 | 4 | 5 |
| **Q.29** | How satisfied are you with your access to health services? | 1 | 2 | 3 | 4 | 5 |
| **Q.30** | How satisfied are you with your transport? | 1 | 2 | 3 | 4 | 5 |

The following question refers to **how often** you have felt or experienced certain things in the **LAST TWO WEEKS.**

|  |  | Never | Seldom | Quite often | Very often | Always |
| --- | --- | --- | --- | --- | --- | --- |
| **Q.31** | How often do you have negative feelings such as blue mood, despair, anxiety, depression? | 1 | 2 | 3 | 4 | 5 |

**THANK YOU FOR YOUR PARTICIPATION**

**WISH YOU A LOT OF JOY AND HEALTH!**
